# Supplementary material
Source: MDPI journal article supplement (https://www.mdpi.com/2076-3417/12/15/7526)
Supplement: s1 [file s1]

# Supplementary Materials:

**Table S1.** Distribution of land use/land cover type (%) across sampling locations.

| Land use/land cover type (%) | Sampling locations |       |
|------------------------------|--------------------|-------|
|                              | MA04               | MA05  |
| Crop Barley/Soybeans         | 1.5                | -     |
| Barren                       | -                  | 4.12  |
| Corn                         | 29.79              | 4.3   |
| Deciduous Forest             | 11.38              | 64.42 |
| Evergreen Forest             | -                  | 0.93  |
| Other Hay/Non Alfalfa        | 2.31               | 3.53  |
| Grass/Pasture                | 2.41               | 5.33  |
| Shrubland                    | 0.45               | 1.39  |
| Soybeans                     | 19.95              | 3.55  |
| Sod/Grass Seed               | 0.27               | -     |
| Developed/Open Space         | 3.01               | 8.82  |
| Developed/Low Intensity      | 0.49               | 1.22  |
| Open Water                   | 0.68               | 0.56  |
| Woody Wetlands               | 17.32              | -     |
| Herbaceous Wetlands          | 0.33               | -     |
| Winter Wheat                 | 8.99               | 0.87  |

**Table S2.** Rainfall amounts (mm) for the one day (Rain1) or seven days (Rain7) preceding sampling events for *S. enterica* or *L. monocytogenes* at four sites.

|            | MA04  |        | MA05  |        | MA10  |        | MA11   |        |
|------------|-------|--------|-------|--------|-------|--------|--------|--------|
|            | Rain1 | Rain7  | Rain1 | Rain7  | Rain1 | Rain7  | Rain1  | Rain7  |
| 10/24/2016 | 0.25  | 2.79   | 0     | 2.5    | 0     | 25.4   | 0      | 63.50  |
| 11/14/2016 | 0     | 0      | 0     | 3.30   | 0     | 6.35   | 0      | 4.57   |
| 12/5/2016  | 8.12  | 12.19  | 5.84  | 23.11  | 0     | 3.30   | 10.66  | 16.25  |
| 1/23/2017  | 0     | 0.25   | 16.76 | 26.41  | 5.08  | 22.35  | 0      | 0.76   |
| 3/13/2017  | 0     | 14.98  | 0     | 6.09   | 16.76 | 26.41  | 1.52   | 2.79   |
| 4/17/2017  | 0     | 29.71  | 1.77  | 3.81   | 0     | 6.09   | 0      | 21.33  |
| 5/8/2017   | 45.97 | 47.49  | 0.25  | 37.84  | 1.77  | 3.81   | 0      | 0      |
| 6/12/2017  | 0     | 57.40  | 0     | 0      | 0.25  | 37.84  | 0.25   | 7.36   |
| 6/26/2017  | 0     | 17.27  | 0     | 15.24  | 0     | 0      | 27.94  | 29.97  |
| 7/17/2017  | 0     | 0.50   | 0     | 23.36  | 0     | 15.24  | 0      | 30.98  |
| 8/8/2017   | 3.30  | 13.97  | 30.73 | 30.73  | 0     | 23.36  | 0      | 5.33   |
| 8/21/2017  | 37.59 | 37.84  | 0     | 4.82   | 30.73 | 30.73  | 0      | 0.50   |
| 9/11/2017  | 0.25  | 21.33  | 0     | 20.57  | 0     | 20.57  | 0.76   | 11.93  |
| 9/25/2017  | 0     | 3.30   | 0     | 0      | 0     | 0      | 0      | 1.01   |
| 10/16/2017 | 0     | 0.76   | 4.31  | 24.38  | 4.31  | 24.38  | 3.55   | 22.60  |
| 10/30/2017 | 2.28  | 92.45  | 39.87 | 45.21  | 39.87 | 45.21  | 0      | 2.79   |
| 11/13/2017 | 0     | 12.19  | 0     | 30.48  | 0     | 30.48  | 0      | 0      |
| 12/11/2017 | 0     | 1.52   | 0     | 5.33   | 0     | 5.33   | 106.42 | 129.79 |
| 1/22/2018  | 0     | 2.28   | 0     | 0.76   | 0     | 0.76   | 0      | 14.98  |
| 2/12/2018  | 0     | 122.42 | 54.35 | 100.83 | 54.35 | 100.83 | 0      | 1.01   |
| 3/12/2018  | 0     | 0.50   | 0.25  | 0.25   | 0.25  | 0.25   | 0      | 0      |
| 4/9/2018   | 0     | 7.62   | 0     | 1.01   | 0     | 1.01   | 0.50   | 143.51 |

|           |      |       |       |       |       |       |      |       |
|-----------|------|-------|-------|-------|-------|-------|------|-------|
| 5/7/2018  | 0    | 0     | 0     | 0     | 0     | 0     | 26.6 | 33.78 |
| 5/21/2018 | 0    | 62.99 | 0     | 86.61 | 0     | 86.61 | 0.76 | 1.52  |
| 6/4/2018  | 0    | 17.27 | 38.86 | 67.56 | 38.86 | 67.56 | 0    | 13.71 |
| 6/18/2018 | 44.4 | 55.11 | 0     | 0     | 0     | 0     | 0    | 80.01 |
| 7/16/2018 | 0    | 0     | 0     | 0     | 0     | 0     | 0    | 0     |
| 8/6/2018  | 0    | 0     | 0     | 62.48 | 0     | 62.48 | 0    | 0     |

---
